# Supplementary material for: A Joint Model for the Kinetics of CTC Count and PSA Concentration During Treatment in Metastatic Castration-Resistant Prostate Cancer
Source: PubMed Central journal article supplement — CPT Pharmacometrics Syst Pharmacol. 2015 Apr 24;4(5):277–85. doi: 10.1002/psp4.34 (PMC4452933; doi:10.1002/psp4.34), 2015-04-24
Supplement: psp40004-0277-sd1.pdf [file psp40004-0277-sd1.pdf]

# SUPPLEMENTAL MATERIAL

## Supplementary Material 1 – Heterogeneity of individual kinetic profiles

**Figure S1a – Spaghetti plots**

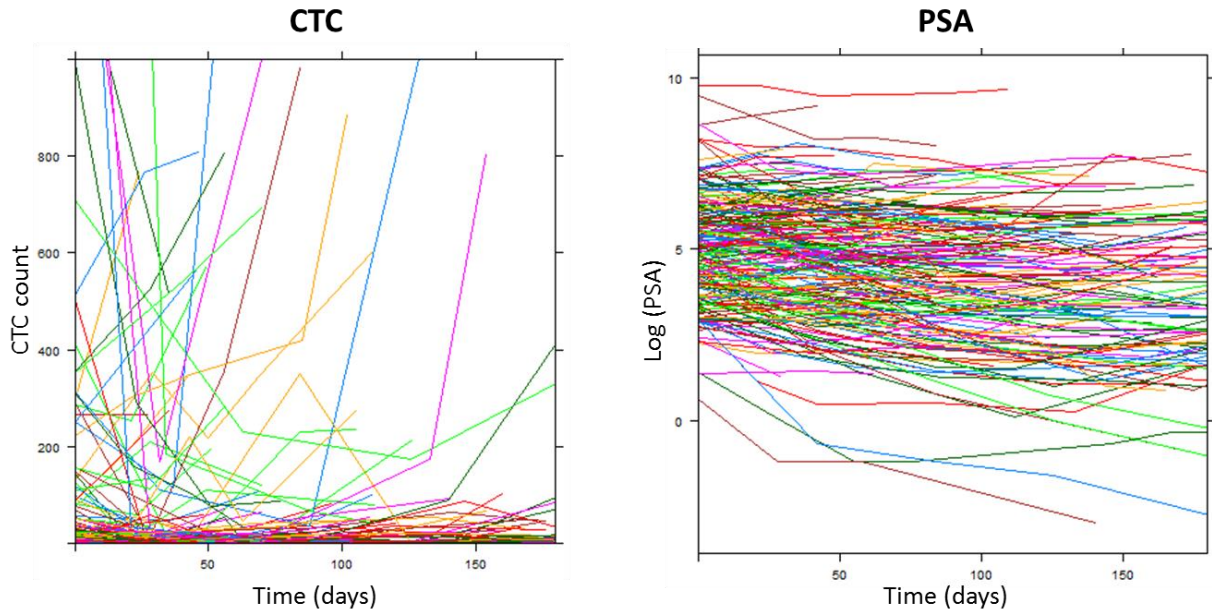

All 223 individual profiles were plotted for PSA and CTC. Each color corresponds to one individual.

**Figure S1b - Different types of observed individual kinetic profiles**

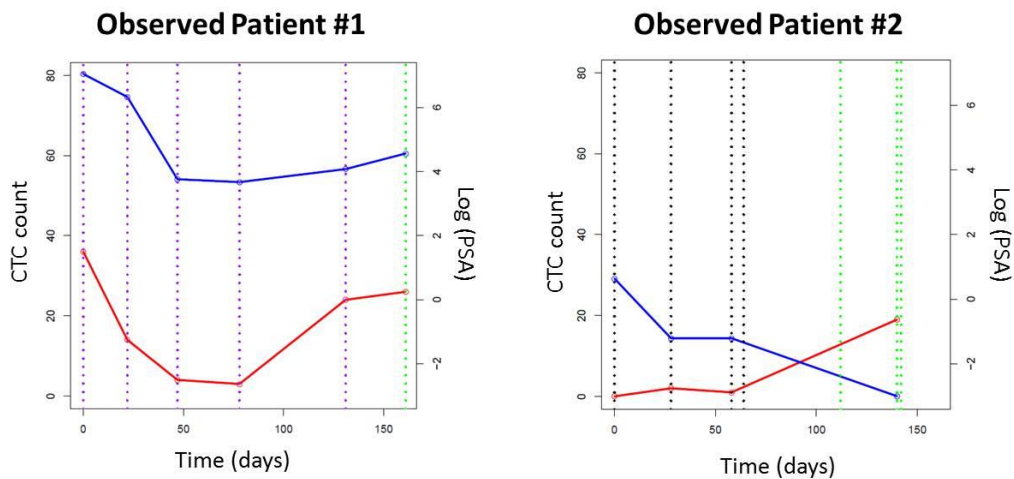

Blue curves represent the PSA kinetics and red curves the CTC kinetics. Vertical dashed lines represent the treatment cycles: chemotherapy in black, hormonotherapy in green, and both treatments administered simultaneously in purple.

**Figure S1c** - Different types of simulated individual kinetic profiles

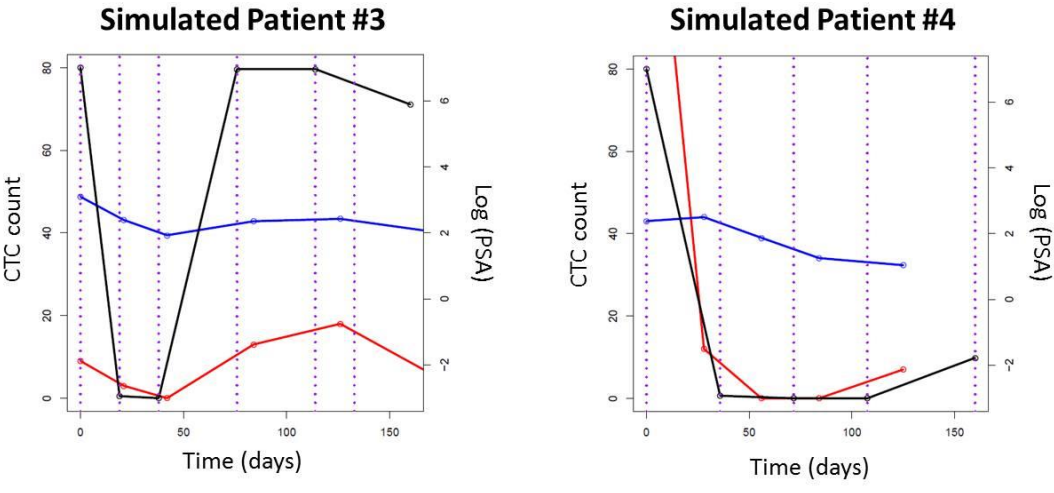

Blue curves represent PSA kinetics, red curves CTC kinetics, and black curves the latent variable kinetics. Vertical dashed lines represent the treatment cycles.

## Supplementary Material 2 – Model including the delayed compartments

To estimate the CTC lifespan, the model was implemented in NONMEM using delayed compartments with the ALAG function. Figure S2 represents the model including the delayed compartments.

Figure S2 – Model including the delayed compartments

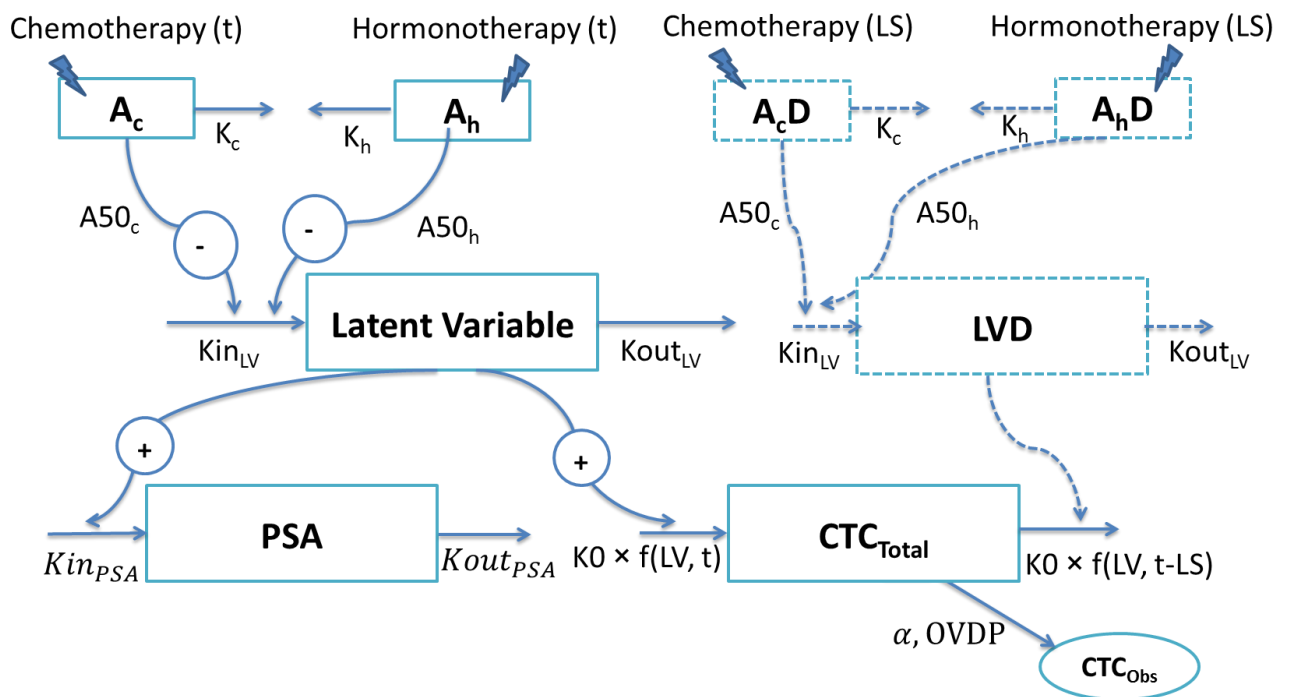

This model was described by the following equations:

$$\left\{ \begin{array}{l}
\frac{dA_c}{dt} = -K_c \times A_c \\
\frac{dA_c D}{dt} = -K_c \times A_c D \\
\frac{dA_h}{dt} = -K_h \times A_h \\
\frac{dA_h D}{dt} = -K_h \times A_h D \\
\frac{dLV}{dt} = Kin_{LV} \times \left(1 - \frac{A_c}{A50_c + A_c}\right) \times \left(1 - \frac{A_h}{A50_h + A_h}\right) - Kout_{LV} \times LV \\
\frac{dLVD}{dt} = Kin_{LV} \times \left(1 - \frac{A_c D}{A50_c + A_c D}\right) \times \left(1 - \frac{A_h D}{A50_h + A_h D}\right) - Kout_{LV} \times LVD \quad (if t > LS) \\
\frac{dLVD}{dt} = 0 \quad (if 0 < t < LS) \\
\frac{dPSA}{dt} = Kin_{PSA} \times LV - Kout_{PSA} \times PSA \\
\frac{dCTC_{Total}}{dt} = K0 \times LV - K0 \times LVD
\end{array} \right.$$

$A_c$  and  $A_h$  represent drug amounts in the chemotherapy and the hormonotherapy compartments (*Arbitrary Unit, AU*), respectively.  $A_c D$  and  $A_h D$  represent drug amounts in the delayed chemotherapy and the delayed hormonotherapy compartments (*Arbitrary Unit, AU*), respectively.  $K_c$  and  $K_h$  are the chemotherapy and hormonotherapy kinetics rate constants, respectively ( $day^{-1}$ ).  $A50_c$  and  $A50_h$  respectively are the amounts of each treatment producing 50% of the maximum effect (*AU*).  $LV$  corresponds to the latent variable (*AU*), and  $Kin_{LV}$  and  $Kout_{LV}$  are their production and elimination rates ( $AU \cdot day^{-1}$  and  $day^{-1}$ ), respectively.  $LVD$  corresponds to the delayed latent variable (*AU*).  $LVD$  is supposed to be constant and equal to  $LVD0$  for times before the lifespan.  $Kin_{PSA}$  and  $Kout_{PSA}$  correspond to the PSA production and elimination rates ( $ng \cdot ml^{-1} \cdot day^{-1} \cdot AU^{-1}$  and  $day^{-1}$ ), respectively.  $K0$  is the CTC production rate ( $CTC \cdot day^{-1} \cdot AU^{-1}$ ).

The initial conditions of the model at time 0 were as follows:

$$\left\{ \begin{array}{l} A_c(0) = 0 \\ A_cD(0) = 0 \\ A_h(0) = 0 \\ A_hD(0) = 0 \\ LV(0) = LV_0 \text{ with } LV_0 < \frac{Kin_{LV}}{Kout_{LV}} \\ LVD(0) = LV_0 \\ PSA(0) = PSA_0 \\ CTC_{Total}(0) = K_0 \times LS \times LV_0 \end{array} \right.$$

$$LS = ALAG_{A_cD} = ALAG_{A_hD} = ALAG_{LVD}$$

$LV_0$  and  $PSA_0$  are the initial latent variable value (AU) and the initial PSA concentration (ng/ml), respectively.  $LS$  correspond to the CTC lifespan (day).

### Supplementary Material 3 – Data file and NONMEM code

#### Fragment of data file:

| ID | TIME | AMT | DV       | CMT | MDV |
|----|------|-----|----------|-----|-----|
| 1  | 0    | 1   | .        | 1   | 1   |
| 1  | 0    | 1   | .        | 2   | 1   |
| 1  | 0    | 1   | .        | 5   | 1   |
| 1  | 0    | 1   | .        | 6   | 1   |
| 1  | 0    | 1   | .        | 4   | 1   |
| 1  | 0    | .   | 11       | 4   | 0   |
| 1  | 0    | .   | 4.127134 | 8   | 0   |
| 1  | 21   | 1   | .        | 1   | 1   |
| 1  | 21   | 1   | .        | 2   | 1   |
| 1  | 21   | 1   | .        | 5   | 1   |
| 1  | 21   | 1   | .        | 6   | 1   |
| 1  | 21   | .   | 0        | 4   | 0   |
| 1  | 21   | .   | 3.688879 | 8   | 0   |
| 1  | 42   | 1   | .        | 1   | 1   |
| 1  | 42   | 1   | .        | 2   | 1   |
| 1  | 42   | 1   | .        | 5   | 1   |
| 1  | 42   | 1   | .        | 6   | 1   |
| 1  | 42   | .   | 0        | 4   | 0   |
| 1  | 42   | .   | 3.391147 | 8   | 0   |

CMT: 1=Chemotherapy; 2=Hormonotherapy; 4=CTC; 5=Delayed Chemotherapy; 6=Delayed Hormonotherapy; 8=PSA.

#### NONMEM Code:

**\$PROBLEM** Joint model of PSA and CTC count kinetics in mCRPC patients

**\$INPUT** ID TIME AMT DV CMT MDV

**\$DATA** ...

**\$SUBROUTINE** ADVAN13 TOL=9

**\$MODEL** NCOMP=8

COMP = (A1) ; PK chemotherapy

COMP = (A2) ; PK hormonotherapy

COMP = (A3) ; Latent Variable

COMP = (A4) ; CTC

COMP = (A5) ; Delayed PK chemotherapy

COMP = (A6) ; Delayed PK hormonotherapy

COMP = (A7) ; Delayed Latent Variable

COMP = (A8) ; PSA

**\$PK** CALLFL=-2 ; Call the PK subroutine with every event record, with additional and lagged doses

MU\_1=LOG(THETA(1))

LV0=EXP(MU\_1+ETA(1)) ; Initial Latent Variable

MU\_2=LOG(THETA(2))

Kc=EXP(MU\_2+ETA(2)) ; Chemotherapy kinetic rate constant

MU\_3=LOG(THETA(3))  
 Kh=EXP(MU\_3+ETA(3)) ; Hormonotherapy kinetic rate constant

MU\_4=LOG(THETA(4))  
 A50c=EXP(MU\_4+ETA(4)) ; Amount of chemotherapy producing 50% of the maximum effect

MU\_5=LOG(THETA(5))  
 A50h=EXP(MU\_5+ETA(5)) ; Amount of hormonotherapy producing 50% of the maximum effect

MU\_6=LOG(THETA(6))  
 KOUTLV=EXP(MU\_6+ETA(6)) ; Latent Variable elimination rate constant

MU\_7=THETA(7)  
 SFLV=EXP(MU\_7+ETA(7))  
 KINLV=(TS0\*KOUTTS)/((SFLV)/(1+(SFLV))) ; Latent Variable production rate

MU\_8=LOG(THETA(8))  
 KINPSA=EXP(MU\_8+ETA(8)) ; PSA production rate

MU\_9=LOG(THETA(9))  
 KOUTPSA=EXP(MU\_9+ETA(9)) ; PSA elimination rate constant

MU\_10=LOG(THETA(10))  
 PSA0=EXP(MU\_10+ETA(10)) ; Initial PSA concentration

MU\_11=THETA(11)  
 K0=MU\_11+ETA(11) ; CTC production rate

MU\_12=THETA(12)  
 ALAG5=MU\_12+ETA(12) ; Delay duration, lifespan (LS)  
 ALAG6=ALAG5  
 ALAG7=ALAG5

F4=K0\*ALAG5 ; Initial condition for CTC: CTC(0)=K0\*LS\*LV0 (LV0=1)

MU\_13=LOG(THETA(13))  
 OVDP=EXP(MU\_13+ETA(13)) ; Overdispersion

MU\_14=LOG(THETA(14))  
 W1=EXP(MU\_14+ETA(14)) ; Standard deviation for PSA residual error

; Initial Conditions at time 0:

A\_0(1)=0  
 A\_0(2)=0  
 A\_0(3)=LV0  
 A\_0(5)=0  
 A\_0(6)=0  
 A\_0(7)=LV0  
 A\_0(8)=PSA0

### \$DES

DADT(1)=-Kc\*A(1) ; Time course of chemotherapy amount  
 DADT(2)=-Kh\*A(2) ; Time course of hormonotherapy amount  
 DADT(3)=KINLV\*(1-(A(1)/(A50c+A(1))))\*(1-(A(2)/(A50h+A(2))))-KOUTLV\*A(3) ; Time course of LV  
 DADT(5)=-Kc\*A(5) ; Delayed time course of chemotherapy amount  
 DADT(6)=-Kh\*A(6) ; Delayed time course of hormonotherapy amount

DADT(7)=KINLV\*(1-(A(5)/(A50c+A(5))))\*(1-(A(6)/(A50h+A(6))))-KOUTLV\*A(7) ; Delayed time course of LV

A7=LV0  
IF(T.GT.ALAG5) A7=A(7)

DADT(4)=K0\*A(3)-K0\*A(7) ; Time course of total CTCs  
DADT(8)=KINPSA\*A(3)-KOUTPSA\*A(8) ; Time course of PSA

### **\$ERROR**

LAMB=A(4)\*0.0015 ; Expected number of CTCs in the aliquot

PSA=A(8)  
nCTC=DV

; Factorial:  
LFAC=GAMLN(nCTC+1.)

;gamma functions of the negative binomial model expression:

LGAM1=GAMLN(nCTC+1/OVDP)  
LGAM2=GAMLN(1/OVDP)  
LTRM1=(LOG(1/(1+OVDP\*LAMB)))\*(1/OVDP)  
LTRM2=(LOG(LAMB/(LAMB+1/OVDP)))\*(nCTC)

;Logarithm of the Negative Binomial distribution:

LNB=LGAM1-LFAC-LGAM2+LTRM1+LTRM2

; CTC observation:

IF (CMT.EQ.4) THEN  
F\_FLAG=2  
Y=-2\*LNB ; -2 Log Likelihood  
ENDIF

; PSA observation:

IF (CMT.EQ.8) THEN  
F\_FLAG=0  
IPRED=LOG(PSA)  
Y=IPRED+W1\*ERR(1)  
IRES=DV-IPRED  
IWRES=IRES/W1  
ENDIF

### **\$THETA**

1 FIX ; LV0  
(0,0.5) ; Kc  
(0,0.5) ; Kh  
(0,0.0001) ; A50c  
(0,0.006) ; A50h  
(0,0.004) ; KOUTLV  
(6) ; SFLV  
(0,3) ; KINPSA  
(0,0.008) ; KOUTPSA  
(0,150) ; PSA0  
(0,300) ; K0  
(0,50) ; ALAG5  
(0,3) ; OVDP  
(0,0.3) ; W1

### **\$OMEGA**

0 FIX ; LV0



**\$OMEGA BLOCK(9)**

0.5 ; Kc  
0.01 0.5 ; Kh  
0.01 0.01 0.5 ; A50c  
0.01 0.01 0.01 0.5 ; A50h  
0.01 0.01 0.01 0.01 0.5 ; KOUTLV  
0.01 0.01 0.01 0.01 0.01 0.5 ; SFLV  
0.01 0.01 0.01 0.01 0.01 0.01 0.5 ; KINPSA  
0.01 0.01 0.01 0.01 0.01 0.01 0.01 0.5 ; KOUTPSA  
0.01 0.01 0.01 0.01 0.01 0.01 0.01 0.01 0.5 ; PSA0

**\$OMEGA BLOCK(2)**

10 ; K0  
1 10 ; ALAG5

**\$OMEGA**

0.5 ; OVDP  
0 FIX ; W1

**\$SIGMA**

1 FIX

**\$ESTIMATION METHOD=SAEM LAPLACE INTER NUMERICAL**

**Supplementary Material 4 – Categorical VPCs for the dichotomized CTC count (<5 vs ≥ 5)**

**Figure S3 – Categorical VPCs (CTC count <5 vs CTC count ≥ 5)**

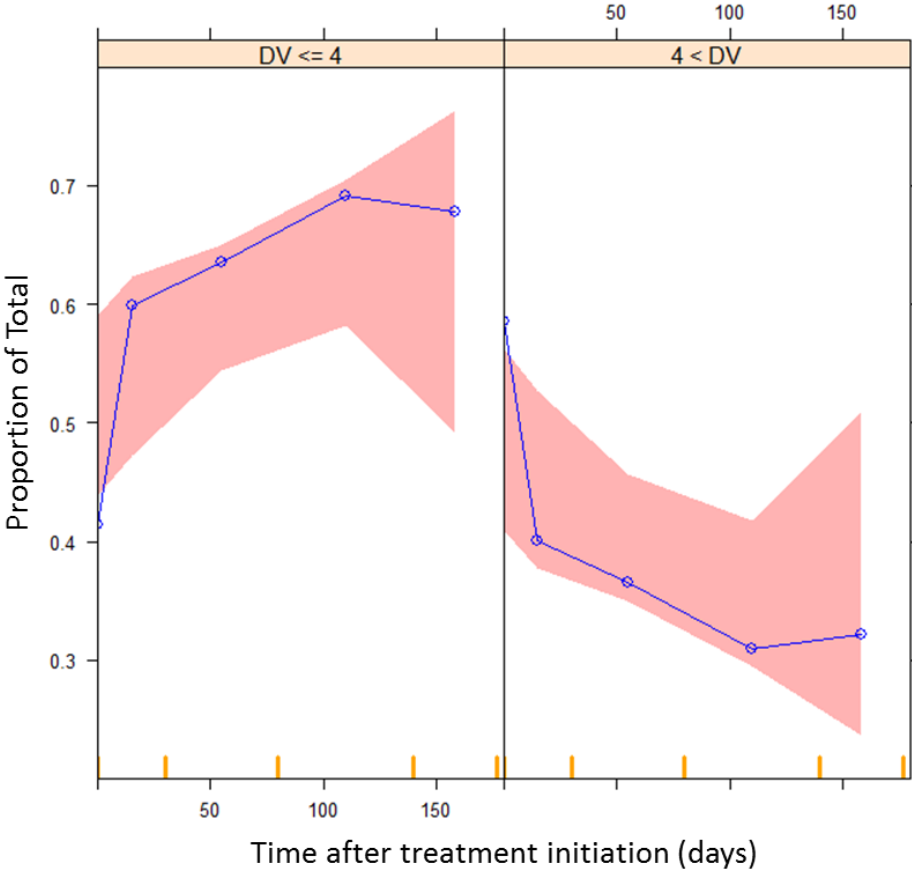

The probabilities of having a number of CTCs lower than 5 or greater than 5 were plotted versus time. Red areas are the 95% confidence intervals of the simulated median probabilities. Blue lines are the observed probabilities.
